## Regulation of blood cell transdifferentiation by oxygen sensing neurons in *Drosophila*

Sean Corcoran<sup>2</sup>, Anjeli Mase<sup>2</sup>, Yousuf Hashmi<sup>2</sup>, Debra Ouyang<sup>2</sup>, Jordan Augsburg<sup>2</sup>, Thea Jacobs<sup>2</sup>,  
Katelyn Kukar<sup>2</sup>, Katja Brückner<sup>1, 2, 3, 4</sup>

<sup>1</sup>Eli and Edythe Broad Center of Regeneration Medicine and Stem Cell Research

<sup>2</sup>Department of Cell and Tissue Biology

<sup>3</sup>Cardiovascular Research Institute, University of California San Francisco, San Francisco, CA

<sup>4</sup> Corresponding Author:

35 Medical Center Way

San Francisco, CA 94143-066

e-mail: [katja.brueckner@ucsf.edu](mailto:katja.brueckner@ucsf.edu)

## Highlights

- Functional lineage tracing reveals in vivo transdifferentiation in a *Drosophila* model of hematopoiesis
- Active sensory neurons of the caudal sensory cones promote blood cell transdifferentiation in the *Drosophila* larva
- Environmental oxygen sensing through atypical guanylyl cyclases in sensory cone neurons drives blood cell transdifferentiation

## Keywords

*Drosophila melanogaster*, transdifferentiation, hematopoiesis, microenvironment, hemocyte, macrophage, plasmatocyte, crystal cell, sensory neurons, sensory cones, atypical guanylyl cyclase, oxygen sensing, hypoxia

## 1 **Summary**

2 Transdifferentiation generates functionally specialized cell types independent of stem or progenitor  
3 cells. Despite the unique nature of the process, it remains poorly understood how transdifferentiation  
4 is regulated in vivo. Here we reveal a mechanism of environmental control of blood cell  
5 transdifferentiation in a *Drosophila melanogaster* model of hematopoiesis. Using functional lineage  
6 tracing, we find in vivo evidence for transdifferentiation from macrophage-like plasmatocytes to  
7 crystal cells that execute melanization. Interestingly, this transdifferentiation is promoted by neuronal  
8 activity of a specific subset of sensory neurons, in the sensory cones at the caudal end of the larva, as  
9 is evidenced through genetic ablation, and manipulation of neuronal activity by *Kir2.1* and *TrpA1*.  
10 Crystal cells develop from plasmatocyte clusters surrounding the sensory cones. Strikingly,  
11 environmental conditions trigger this process: oxygen sensing, through atypical guanylyl cyclases  
12 (*Gyc88E*, *Gyc89Da*, *Gyc89Db*) that are specifically expressed in sensory cone neurons, drives  
13 plasmatocyte-to-crystal cell transdifferentiation, as hypoxia or *Gyc* silencing cause crystal cell  
14 reduction and loss of transdifferentiation. Our findings reveal an unexpected functional and molecular  
15 link of environment-monitoring sensory neurons that govern blood cell transdifferentiation in vivo,  
16 suggesting similar principles in vertebrate systems where environmental sensors and blood cell  
17 populations coincide.

18

19

20

## 21 **Introduction**

### 22 *A Drosophila model of blood cell transdifferentiation*

23 The phenomenon of transdifferentiation has been noted in a variety of species (Cieslar-Pobuda et al.,  
24 2017; Graf, 2011; Reid and Tursun, 2018), yet its in vivo regulation remains poorly understood. In  
25 the vertebrate blood cell system, reports of transdifferentiation have for the most part been limited to  
26 cell culture systems and experimental manipulations. For example, C/EBP (CCAAT/enhancer-  
27 binding protein) transcription factors drive transdifferentiation of vertebrate B cells to macrophages  
28 (Xie et al., 2004) (Di Tullio et al., 2011), B lymphoma and leukemia cell lines to macrophages  
29 (Rapino et al., 2013), and B cells to Granulocyte-Macrophage Precursors (Cirovic et al., 2017).  
30 Similarly, manipulation of key transcription factors such as FLI1 and ERG results in  
31 transdifferentiation of erythroblasts to megakaryocytes (Siripin et al., 2015), and deletion of the BAF  
32 Chromatin Remodeling Complex Subunit Bcl11b triggers T cell transition to NK cells (Li et al.,  
33 2010). Transdifferentiation of lymphoid and myeloid cells has been modeled mathematically  
34 (Collombet et al., 2017). However, in vivo, the underlying cellular and molecular mechanisms of  
35 blood cell transdifferentiation during development and homeostasis and the role of the environment  
36 remain elusive.

37 To investigate principles of in vivo transdifferentiation in the hematopoietic system, we turned to a  
38 model in *Drosophila melanogaster*. *Drosophila* offers proven parallels to the two major lineages that  
39 produce myeloid blood cells in vertebrates (Davies et al., 2013; Perdiguero and Geissmann, 2016;  
40 Sieweke and Allen, 2013), with its two myeloid lineages of blood cells, or hemocytes (Gold and  
41 Brückner, 2014, 2015; Holz et al., 2003), (1) the embryonic lineage of hemocytes that proliferate as  
42 differentiated cells in hematopoietic pockets of the larval body wall, and resemble vertebrate tissue  
43 macrophages, and (2) the progenitor-based lymph gland lineage (Banerjee et al., 2019). Both  
44 *Drosophila* blood cell lineages produce at least three differentiated blood cell types: macrophage-like  
45 plasmatocytes, crystal cells that mediate melanization, and lamellocytes, large immune cells  
46 specialized for encapsulation (Banerjee et al., 2019; Gold and Brückner, 2014, 2015). During larval  
47 stages, embryonic-lineage plasmatocytes show signs of fate changes to other blood cell types:  
48 Transdifferentiation to lamellocytes occurs in response to immune challenges (Markus et al., 2009),  
49 and transdifferentiation to crystal cells was suggested even under steady state conditions (Leitao and  
50 Sucena, 2015). However, it remains unclear what are the anatomical requirements and environmental  
51 inputs that regulate plasmatocyte-to-crystal cell transdifferentiation in vivo. Hematopoietic sites of

52 the *Drosophila* larva contain sensory neuron clusters of the peripheral nervous system (PNS) that  
53 serve as microenvironments for plasmatocyte survival, proliferation and localization (Gold and  
54 Brückner, 2014, 2015; Makhijani et al., 2017; Makhijani et al., 2011; Makhijani and Brückner, 2012).  
55 Considering this, we investigated the role of these specialized hematopoietic pockets in hemocyte  
56 transdifferentiation.

57

## 58 **Results**

### 59 *Phagocytic plasmatocytes transdifferentiate to crystal cells*

60 First we examined the formation of crystal cells and their anatomical locations during larval  
61 development. We quantified crystal cells using a traditional way of labeling crystal cells based on  
62 their expression of prophenoloxidasases (Corcoran and Brückner, 2020; Rizki and Rizki, 1959),  
63 enzymes responsible for melanization, the main immune function of crystal cells (Bidla et al., 2009;  
64 Dudzic et al., 2015; Lu et al., 2014). Induction of melanization blackens crystal cells (Corcoran and  
65 Brückner, 2020; Rizki and Rizki, 1959) and marks similar cell populations as the crystal cell reporter  
66 *lozenge-GAL4 (lz-GAL4; UAS-GFP)* (SupplFig. 1 A, B). During larval development, crystal cell  
67 numbers increase slowly over the first and second larval instar stages, but expand more rapidly  
68 during the third instar stage (Fig. 1 A), largely mirroring the exponential increase of plasmatocytes  
69 during larval development (Fig 1 B) (Makhijani et al., 2011; Petraki et al., 2015). To visualize the  
70 locations of crystal cells and plasmatocytes, we coexpressed two fluorescent protein reporters (for  
71 crystal cells *BcF2-GFP* (Tokusumi et al., 2009), and for plasmatocytes *HmlΔ-DsRed* (Makhijani et  
72 al., 2011)). Interestingly, crystal cells are strongly enriched in a cluster in the terminal segment of the  
73 *Drosophila* larva, a region where plasmatocytes are also known to accumulate (Fig. 1 C-C'', D-D')  
74 (Makhijani et al., 2011). Crystal cells are occasionally also found in other hematopoietic pockets, and  
75 in dorsal vessel-associated clusters where floating hemocytes accumulate (Cevik et al., 2019; Petraki  
76 et al., 2015).

77 Since previous studies suggested plasmatocyte-to-crystal cell transdifferentiation solely based on live  
78 imaging (Leitao and Sucena, 2015), we sought an independent functional lineage tracing approach.  
79 Asking whether crystal cells derive from undifferentiated progenitors or differentiated,  
80 phagocytically active plasmatocytes, we traced cells based on the unique ability of differentiated  
81 plasmatocytes to phagocytically uptake fluorescently labeled beads (Fig. 1 E-E'''). We injected  
82 *Drosophila* larvae expressing fluorescent reporters for plasmatocytes and crystal cells with blue

83 fluorescent latex beads. Injected larvae were incubated in a time course, followed by the release of  
84 hemocytes and quantification of the relative fractions of phagocytosis-labeled plasmatocytes and -  
85 crystal cells (Fig. 1 F, G). The fraction of blue bead positive plasmatocytes quickly reached saturation  
86 (~50% at 1h, ~90% at 4h and 22h). In contrast, crystal cells were labeled by blue beads with a  
87 significant time delay (<10% at 1h, ~ 50% at 4h, ~70% at 22h) (Fig. 1 G). Together with previous  
88 reports that suggested crystal cells are not capable of phagocytosis or proliferation (Lanot et al., 2001;  
89 Leitao and Sucena, 2015; Tattikota et al., 2019) this supports a model of plasmatocyte-to-crystal cell  
90 transdifferentiation, in which crystal cells derive from phagocytically active plasmatocytes, rather than  
91 from undifferentiated, phagocytosis-incompetent progenitors.

### 92 *Sensory neuron activity promotes crystal cell transdifferentiation*

93 Next, we investigated the anatomical locations of crystal cells and plasmatocytes relative to sensory  
94 neurons, using fluorescent reporters and live imaging, including the sensory neuron specific driver  
95 *21-7-GALA*, *UAS-CD8-GFP* (Song et al., 2007) (Fig. 2 A). We found that both plasmatocytes and  
96 crystal cells colocalize with sensory neurons, with one important difference: plasmatocytes are found  
97 in all hematopoietic pockets (Fig. 2 A), while crystal cells are mainly localized in the terminal  
98 hematopoietic pocket of the larva (Fig. 2 B).

99 Given this colocalization with sensory neurons, we asked whether sensory neuron activity has an  
100 effect on crystal cell generation. To mimic activation of sensory neurons, we exposed larvae to the  
101 acetylcholine receptor agonist carbamoycholine (carbachol). Carbachol exposure over 4 hours  
102 resulted in a moderate increase of crystal cell numbers (Fig. 2 C). More specifically and  
103 complementary to this, we silenced sensory neurons by transient expression of *Kir2.1*, an inward  
104 rectifying K<sup>+</sup> channel that causes neuron hyperpolarization (Baines et al., 2001). Interestingly, *Kir2.1*  
105 expression over 22 hours caused a dramatic drop in crystal cell numbers (Fig. 2 D). There was no  
106 significant effect of neuronal silencing on total hemocyte numbers under comparable conditions  
107 (SupplFig. 2 and (Makhijani et al., 2017)). To address whether sensory neuron silencing by *Kir2.1*  
108 affects plasmatocyte to crystal cell transdifferentiation, we performed phagocytosis lineage tracing.  
109 Indeed, transient neuronal silencing affects the fraction of crystal cells derived from blue bead labeled  
110 plasmatocytes, while the ability of plasmatocytes to phagocytose remains the same (Fig. 2 E, F).  
111 Taken together, our findings suggest that sensory neuron activity promotes transdifferentiation of  
112 plasmatocytes to crystal cells.

113

114 *Crystal cells colocalize with, and require, sensory neurons of the sensory cones*

115 To gain more insight, we focused on the caudal cluster of crystal cells. Closer inspection of combined  
116 fluorescent reporters for crystal cells and sensory neurons showed that crystal cells colocalize  
117 particularly well with sensory organs of the sensory cones (Fig. 3 A-A'' and C-D''), protruding  
118 structures that are grouped around the posterior spiracles, the terminal tubes of the tracheal system  
119 (Hayashi and Kondo, 2018; Kuhn et al., 1992). Plasmatocytes accumulate in a large cluster around  
120 the sensory cones already in the 2<sup>nd</sup> instar larva (Fig. 3 B-B''), which seems to foreshadow the pattern  
121 and abundance of crystal cells in the 3<sup>rd</sup> instar larva (Fig. 3 D-D''). We therefore hypothesized that  
122 many plasmatocytes of the 2<sup>nd</sup> instar larva may transdifferentiate to crystal cells, as is apparent in the  
123 3<sup>rd</sup> instar.

124 Given the intriguing colocalization of crystal cells and sensory neurons and the dependence of blood  
125 cell transdifferentiation on neuronal activity, we investigated the specific requirement of sensory cone  
126 neurons for crystal cell production. A group of genes specifically expressed in sensory cone neurons  
127 are atypical guanylyl cyclases, *Gyc88E*, *Gyc89Da*, and *Gyc89Db* (Vermehren-Schmaedick et al.,  
128 2010). Using the driver *Gyc89Db-GAL4* (Vermehren-Schmaedick et al., 2010) (Fig. 3 E, F), we  
129 ablated sensory cone neurons by expressing the proapoptotic gene *head involution defect (Hid)* in its  
130 non-repressible version (*Hid<sup>ala5</sup>*) (Bergmann et al., 2002). Ablation of sensory cone neurons did not  
131 affect larval viability, but it strongly reduced crystal cell numbers (Fig. 3 G). Conversely, ectopic  
132 activation of sensory cone neurons by specific expression and transient induction of the heat-induced  
133 cation channel TrpA1 (Hamada et al., 2008) caused a significant increase in crystal cells (Fig. 3 H).  
134 Taken together, we conclude that crystal cells and their precursor plasmatocytes are strongly enriched  
135 at the sensory cones of the larva. Sensory cone neurons, and their activity, are required for crystal  
136 cells.

137 *Oxygen sensing through atypical guanylyl cyclases drives plasmatocyte-to-crystal cell*  
138 *transdifferentiation*

139 The atypical guanylyl cyclases *Gyc88E*, *Gyc89Da*, and *Gyc89Db* are cytoplasmic oxygen sensors  
140 that form heterodimers of *Gyc88E* and either *Gyc89Da* or *Gyc89Db*, and *Gyc88E* homodimers  
141 (Huang et al., 2007; Morton, 2004; Morton et al., 2005; Vermehren et al., 2006). Activated *Gyc*  
142 complexes generate the second messenger cyclic GMP (cGMP), which in turn activates neurons  
143 (Morton, 2004; Morton et al., 2008). Since we found that sensory cone neurons expressing these  
144 genes are required for crystal cell formation, we decided to test *Gyc* function itself in relation to

145 crystal cell transdifferentiation. When the obligatory subunit, *Gyc88E*, was silenced in the sensory  
146 cone neurons, crystal cell numbers were reduced (Fig. 4 A). Phagocytosis lineage tracing confirmed  
147 that *Gyc* function is required for transdifferentiation of plasmatocytes to crystal cells, as the fraction  
148 of crystal cells carrying blue beads was significantly reduced in *Gyc88E* RNAi knockdowns, while  
149 phagocytosis by plasmatocytes remained the same (Fig. 4 B). Given the role of *Gycs* as oxygen  
150 sensors, we next investigated the effect of varying atmospheric oxygen concentrations on crystal cell  
151 formation. Assessing crystal cell numbers per larva as readout, we exposed larvae to 8% or 5%  
152 oxygen for 6 hours. Compared to normoxia (~21% oxygen), 8% hypoxia caused mild reduction in  
153 crystal cells and 5% oxygen caused a significant drop in crystal cells, while total hemocyte numbers  
154 stayed constant (SupplFig. 3 A, B, Fig. 4 C). Following up on the robust results obtained under 5%  
155 oxygen, we determined whether hypoxia affects blood cell transdifferentiation, performing  
156 phagocytosis lineage tracing for 6 hours under hypoxic conditions (5% O<sub>2</sub>) and normoxia.  
157 Interestingly, hypoxia phenocopies silencing of *Gyc* function in sensory cone neurons, resulting in a  
158 significant reduction of blue beads in crystal cells, while phagocytosis levels of plasmatocytes remain  
159 unaffected (Fig. 4 D). We therefore conclude that oxygen sensing through atypical guanylyl cyclases  
160 (*Gycs*) that are linked to activation of the sensory cone neurons drives plasmatocyte-to-crystal cell  
161 transdifferentiation (Fig. 4 E). This model supports the kinetics of crystal cells following  
162 plasmatocyte expansion, based on the transition of plasmatocytes to crystal cells in particular in the  
163 proximity of sensory cone neurons (SupplFig. 4 A).

164

## 165 **Discussion**

166 Our work has identified an unexpected mechanistic link between oxygen sensing and blood cell  
167 transdifferentiation, which is facilitated through a particular set of sensory neurons and intracellular  
168 *Gyc* oxygen sensors. This new paradigm inspires the search for similar principles of neuronally  
169 controlled blood cell transdifferentiation that responds to environmental conditions in other species  
170 including humans.

171 Transdifferentiation results in the conversion of one differentiated cell type to another. In some  
172 systems, new differentiated cell types arise after de-differentiation to a transient pluripotent  
173 intermediate (Graf, 2011; Pesaresi et al., 2019; Reid and Tursun, 2018). Our work supports a model  
174 of direct transdifferentiation based on fluorescent reporters and phagocytosis lineage tracing.  
175 Independent approaches also support a model of continuous blood cell transdifferentiation from



176 plasmatocytes to crystal cells through progressive states, based on single cell RNAseq pseudotime  
177 lineage analysis (Tattikota et al., 2019). Transdifferentiation may be the fastest and most efficient  
178 way for animals to shape the composition of their blood cell pool according to environmental  
179 conditions such as oxygen levels and potentially other inputs.

180 Gyc intracellular oxygen sensors mediate oxygen detection in sensory neurons (Vermehren et al.,  
181 2006), similar to other oxygen sensing mechanisms known in vertebrate neurons and other sensory  
182 cells (Caravagna and Seaborn, 2016; Pokorski et al., 2016). In contrast, HIF (hypoxia inducible  
183 factor) transcription factors regulate target genes in response to low oxygen conditions in a variety of  
184 cell types (Gorr et al., 2006; Majmundar et al., 2010). Hypoxia, through HIF, regulates mammalian  
185 hematopoiesis, lymphopoiesis and erythropoiesis (Chabi et al., 2019; Haase, 2013; Imanirad and  
186 Dzierzak, 2013). The *Drosophila* HIF1a *sim* (*similar*) plays a role in crystal cell formation in the  
187 *Drosophila* lymph gland (Mukherjee et al., 2011), however this effect is independent of HIF1 $\beta$  and  
188 hypoxia target genes. Instead, formation of *Drosophila* crystal cells has been linked to Notch  
189 signaling at various developmental stages (Duvic et al., 2002; Krzemien et al., 2007; Lebestky et al.,  
190 2000; Lebestky et al., 2003; Leitao and Sucena, 2015; Mukherjee et al., 2011). It remains to be  
191 determined whether oxygen sensing neurons and/or the signal receiving plasmatocytes are connected  
192 to Notch signaling or an independent pathway that governs the fate switch of plasmatocytes to crystal  
193 cells.

194 Linking oxygen sensing to crystal cell formation via Gycs may have several advantages. (1) Oxygen  
195 sensing by neurons is more sensitive and immediate, and respond to a variety of environmental  
196 conditions. Sensory cone neurons are at all times in contact with the surrounding atmosphere, based  
197 on social burying behaviors during feeding, when larvae expose their caudal ends with the sensory  
198 cones, also allowing air intake to the tracheal system through the neighboring posterior spiracles  
199 (Hayashi and Kondo, 2018; Wu et al., 2003) (SupplFig. 4 B); eventually larvae exit the food source  
200 to pupariate (Wu et al., 2003) (SupplFig. 4 B). With their exposed nature, the sensory neurons may  
201 also integrate other inputs such as chemical cues or even light from the environment (Stewart et al.,  
202 2015; Vermehren-Schmaedick et al., 2011; Xiang et al., 2010) when communicating to their targets.  
203 (2) Activation of the sensory cone neurons coordinates blood cell transdifferentiation with other  
204 responses to hypoxia, such as a behavioral escape response to hypoxic conditions (Morton, 2011;  
205 Vermehren-Schmaedick et al., 2010). In this context, Gycs generate cGMP, which activates cyclic  
206 nucleotide gated channels (CNG) (Morton et al., 2008; Vermehren-Schmaedick et al., 2010). CNG

207 channels mediate influx of calcium ions, resulting in consecutive activation of calmodulin/CaMK  
208 signaling and sensory transduction (Kaupp and Seifert, 2002; Pifferi et al., 2006).

209 Neuronal regulation of the hematopoietic system and other organs is an important paradigm in  
210 biology, which is starting to come to light in a variety of species (Kumar and Brockes, 2012). In  
211 *Drosophila*, neuronal regulation of hematopoiesis is well established. Embryonic-lineage  
212 plasmacytes depend on sensory neurons for their survival, proliferation and localization (Gold and  
213 Brückner, 2014, 2015; Makhijani et al., 2017; Makhijani et al., 2011; Makhijani and Brückner, 2012).  
214 Activin- $\beta$ , a TGF- $\beta$  family ligand, is a key signal produced by active sensory neurons that promotes  
215 plasmacyte proliferation and adhesion (Makhijani et al., 2017). Identification of the signal/s from  
216 active sensory cone neurons that trigger transdifferentiation will be the focus of intense future study.  
217 We postulate secreted factor/s, which could potentially, albeit at reduced efficiency, also act at a  
218 distance, promoting transdifferentiation of smaller numbers of crystal cells in the dorsal vessel  
219 associated hemocyte clusters (Leitao and Sucena, 2015) and segmental hematopoietic pockets. In this  
220 context it is interesting to note that in long term memory formation, Activin expression is induced  
221 downstream of calmodulin/CaMK/CREB signaling in both *Drosophila* and vertebrates (Inokuchi et  
222 al., 1996; Miyashita et al., 2012), suggesting potential parallels of this signaling cassette in neuron-  
223 induced blood cell transdifferentiation.

224 In vertebrates, functional links of hematopoiesis with sensory neurons or other sensing systems  
225 remain largely unknown, despite some aspects of bone marrow hematopoiesis and inflammatory  
226 responses being regulated by the autonomic nervous system (Hanoun et al., 2015; Pavlov and Tracey,  
227 2012). Oxygen sensing could be an important regulatory factor in recently identified hematopoietic  
228 sites such as the vertebrate lung, which provides a microenvironment for limited blood cell  
229 progenitors and megakaryocytes that are active in platelet production (Lefrancais et al., 2017; Martin  
230 et al., 1983). The lung, like many other organs, also harbors tissue macrophages that proliferate in  
231 local microenvironments and bear evolutionary parallels with *Drosophila* embryonic-lineage  
232 plasmacytes (Gold and Brückner, 2014, 2015; Perdiguero and Geissmann, 2016). Interestingly, the  
233 lung and airways are rich in vagal afferent nerves that sense chemical and mechanical cues (Chang et  
234 al., 2015; Mazzone and Udem, 2016), and neuroendocrine cells of the lung that sense oxygen early  
235 in life and later provide a microenvironment for airway epithelial cells (Caravagna and Seaborn,  
236 2016; Cutz et al., 2007). Investigation of sensory neurons and other sensors may therefore open a new  
237 chapter in the regulation of vertebrate hematopoiesis, transdifferentiation, and immune cell fate and  
238 function.

## 239 **Materials and Methods**

### 240 *Drosophila Strains*

241 *Drosophila* drivers, reporters and related lines used were *HmlΔ-GAL4*, *UAS-GFP* (Sinenko and  
242 Mathey-Prevot, 2004); combination driver *HmlΔGAL4*, *UAS-GFP*; *He-GAL4* ((Yang et al., 2015)  
243 gift from Dan Hultmark), *lz-GAL4*; *UAS-GFP* (J. Pollock, Bloomington), *21-7-GAL4* (Makhijani et  
244 al., 2011; Song et al., 2007) *Gyc89Db-GAL4* (Morton et al., 2008); *BcF6-GFP* (Tokusumi et al.,  
245 2009), *BcF6-mCherry* (Tokusumi et al., 2009), *BcF2-GFP* (Tokusumi et al., 2009); *HmlΔ-DsRed*  
246 (Makhijani et al., 2011); and *tubGAL80ts* (McGuire et al., 2003). UAS lines used were *UAS-CD8-*  
247 *GFP* (Song et al., 2007); *UAS-Kir2.1* (Baines et al., 2001) (Bloomington); *UAS-TrpA1*  
248 (Bloomington); *UAS-Hid ala5* (Bergmann et al., 2002); *UAS-Gyc88E RNAi* (Bloomington). Control  
249 lines used were *w1118* (Bloomington) or *yw* (Bloomington). Unless otherwise stated, fly crosses were  
250 set and maintained at 25° Celsius. Crosses with the driver *Gyc89Db-GAL4* were performed at 29°C to  
251 enhance expression.

### 252 *Hemocyte Quantification*

253 Total hemocyte quantification was performed essentially as described in (Corcoran and Brückner,  
254 2020; Petraki et al., 2015). All fluorescently-marked hemocytes of single larvae were released into  
255 wells marked by a hydrophobic PAP pen (Beckman Coulter) on glass slides filled with 20-30 µL  
256 PBS. Cells were allowed to settle for 15-20 min, and were imaged by fluorescence tile scan  
257 microscopy on a Leica DMI4000B microscope with Leica DFC350FX camera and 20x objective.  
258 Cell numbers in images were analyzed by particle quantification using Fiji/ImageJ (Corcoran and  
259 Brückner, 2020; Petraki et al., 2015; Schindelin et al., 2012).

260 Crystal cell quantification was performed using fluorescent protein reporters or melanization. To  
261 quantify crystal cells in live animals, larvae were placed on a slide in a small drop of 10-15 µl PBS  
262 with a coverslip on top. Fluorescent crystal cells in each segment were manually counted, rolling the  
263 larva by gently moving the coverslip. For phagocytosis lineage tracing, fluorescent crystal cells were  
264 quantified ex vivo (see below). To quantify crystal cells based on their ability to melanize (due to  
265 their hallmark expression of functional Prophenoloxidase 1 and 2) larvae were placed in 250 µl of  
266 PBS in Eppendorf tubes and heated at 65° Celsius for 22 minutes in a heat block, and melanized  
267 (black) cells were quantified under a stereoscope by manual counting (Corcoran and Brückner, 2020;  
268 Rizki and Rizki, 1959).

269 Larvae were analyzed at various developmental times after egg laying (AEL) corresponding to the  
270 following size ranges: 1<sup>st</sup> instar: ~0.5-1.4mm (22-46h AEL); 2<sup>nd</sup> instar: ~1.5-2.6mm (47-77h AEL); 3<sup>rd</sup>  
271 instar: ~2.7- >3.5mm (from 78h AEL). For the crosses used, no developmental delays were observed;  
272 therefore selection of specified larval size ranges from 24h embryo collections was used in lieu of  
273 more tightly timed embryo collections.

#### 274 *Manipulation of Neuronal Activity*

275 To mimic sensory neuron stimulation, larvae were exposed to 10mg/ml carbamylcholine (carbachol,  
276 Sigma Aldrich) in fly food for 4 hours allowing direct cuticle contact with carbachol (Makhijani et  
277 al., 2017).

278 To activate specific neuron populations, the heat-inducible cation channel TrpA1 was ectopically  
279 expressed and transiently heat induced to mimic neuron activation (Hamada et al., 2008).  
280 Sopecifically, *TrpA1* crosses were set at RT and shifted to 29°C for 4h. Larvae were analyzed within  
281 30 minutes following this period.

282 Sensory neuron silencing was achieved by transiently expressing a transgenic of the inward rectifying  
283 potassium channel Kir2.1 (Baines et al., 2001), under control of a sensory neuron specific GAL4  
284 driver and a temperature-sensitive GAL4 inhibitor GAL80ts (McGuire et al., 2003); genotypes for  
285 neuronal silencing experiments were *21-7-GAL4, UAS-GFP, HmlΔDsRed/UAS-Kir2.1;*  
286 *tubGAL80ts/+* with controls *21-7-GAL4, UAS-GFP, HmlΔDsRed/+; tubGAL80ts/+*. F1 from crosses  
287 were raised at 18° Celsius. To temporarily silence sensory neurons, larvae were shifted from 18° to  
288 29° Celsius for 22 hours to destabilize GAL80ts, allowing for expression of Kir2.1, which  
289 hyperpolarizes sensory neuron preventing firing. Larvae were analyzed within 1 hour post-silencing.

#### 290 *Phagocytosis Lineage Tracing*

291 For lineage tracing of crystal cells that derive from actively phagocytic plasmatocytes, larvae with  
292 genotype *HmlΔGAL4, UAS-GFP; BcF6-mCherry* were injected with 69 nl of blue fluorescent  
293 FluoSphere Carboxylate-modified 0.2 um beads (Invitrogen) diluted 1:100 in PBS using a Nanoject  
294 injector (Drummond Scientific). After injection, larvae were placed on food with yeast for 4 hours.  
295 Hemocytes of individual larvae were then released into a well marked on a glass slide by PAP pen  
296 and filled with 20-30 µl PBS; hemocytes were allowed to settle for 15-20 minutes in a wet chamber  
297 (Corcoran and Brückner, 2020; Petraki et al., 2015). Cells were imaged with a Leica DMI4000  
298 microscope with tilescan function. Cell quantification was conducted manually from a representative

299 central field of each image (containing ~150-300 plasmatocytes). For genotypes that give rise to  
300 substantially reduced numbers of crystal cells, crystal cells of the whole tilescan area were analyzed.  
301 Transdifferentiation was quantified by comparing ratios of crystal cells positive for blue particles/  
302 total crystal cells (mCherry positive) for various experimental and control conditions. The same  
303 quantification for plasmatocytes (GFP positive) with blue beads relative to all plasmatocytes was  
304 conducted as an internal control for injection efficiency and phagocytic fitness.

### 305 *Hypoxia experiments*

306 Hypoxia experiments were conducted using a hypoxic chamber (Biospherix, Inc., Laconia, NY).  
307 Oxygen concentrations were set as indicated, supplementing reduced O<sub>2</sub> with N<sub>2</sub>. Incubations were  
308 performed at room temperature (RT) for 6h. Crystal cell melanization assays were conducted with  
309 larvae of the genotype *w<sup>1118</sup>*, and phagocytic lineage tracing and total hemocyte experiments used  
310 *HmlΔ-GAL4, UAS-GFP; BcF6-mCherry* larvae. For all experiments, 15-25 larvae of the desired  
311 age/size and genotype were placed on inactivated yeast paste in cell strainer snap cap tubes, allowing  
312 for rapid gas exchange (Corning #352235). Six cell strainer tubes were held by a fitted rack that was  
313 inserted into a large cylindrical polystyrene *Drosophila* population cage with steel mesh on one side  
314 (custom construction). During transport from the hypoxic chamber to the bench, population cages  
315 were sealed in a plastic bag to maintain hypoxic conditions up to the point when larvae were  
316 analyzed. Control samples were placed in an identical setup but left at normoxic conditions at  
317 comparable temperature (RT) and time (6h). Following hypoxia/normoxia conditions, assays were  
318 conducted as described in the respective paragraphs.

### 319 *Microscopy*

320 Released hemocytes were imaged on a Leica DMI4000B microscope as described above. Live  
321 imaging of larvae was done as described previously, immobilizing larvae on an ice-cooled metal  
322 block (Makhijani et al. *Development* 2011). Imaging was performed using a Leica M205FA  
323 fluorescent stereoscope with DFC300FX color digital camera and Leica LAS Montage module,  
324 combining z-stacks into single in-focus images.

### 325 *Statistical Analysis*

326 For all experiments numbers of larvae per genotype and condition are indicated in the Figure  
327 Legends. For each genotype and condition the mean and standard deviation were determined and  
328 significance was tested by 2-way ANOVA (Prism). For hemocyte counts over the course of larval

329 development, regression analysis was performed (Excel). For phagocytosis lineage tracing, the mean  
330 and standard deviation of percentages of blue bead positive cells were determined and assessed by 2-  
331 way ANOVA (Prism). P-value cutoffs for significance were as follows: \* =  $p < 0.05$ , \*\* =  $p < 0.01$ ,  
332 and \*\*\* =  $p < 0.001$ . Pools of both male and female larvae were analyzed.

333

### 334 **Authors' contributions**

335 KB conceived and supervised the study. SC, AM and KB planned the experiments. SC, AM, JA, YH,  
336 DO, TJ, KK carried out the experiments. SC, AM, JA, YH, DO, TJ, KK and KB analyzed the data.  
337 KB wrote the manuscript with input from all authors.

338

### 339 **Competing interests**

340 The authors have no competing interests.

341

### 342 **Funding**

343 This work was supported by grants from the American Cancer Society RSG DDC-122595, American  
344 Heart Association 13BGIA13730001, National Science Foundation 1326268, and National Institutes  
345 of Health 1R01GM112083, 1R56HL118726 and 1R01GM131094 (to KB).

346

### 347 **Acknowledgements**

348 We thank D. Morton, R. Schulz, U. Banerjee, A. Bergmann, C. Evans, D. Hultmark, Y.N. Jan, L.  
349 Kockel, the Bloomington Stock Center, and TRiP for fly stocks. We are grateful to Khalida Sabeur  
350 and Manideep Chavali for help to access and use hypoxia chamber equipment. Thanks to Ava  
351 Brückner-Kockel for advice on regression analysis. We thank members of the Brückner lab for  
352 discussion and feedback on the manuscript.

353

354

355

356

## 357 **References**

358

- 359 Baines, R.A., Uhler, J.P., Thompson, A., Sweeney, S.T., and Bate, M. (2001). Altered electrical  
360 properties in *Drosophila* neurons developing without synaptic transmission. *J Neurosci* *21*, 1523-  
361 1531.
- 362 Banerjee, U., Girard, J.R., Goins, L.M., and Spratford, C.M. (2019). *Drosophila* as a Genetic Model  
363 for Hematopoiesis. *Genetics* *211*, 367-417.
- 364 Bergmann, A., Tugentman, M., Shilo, B.Z., and Steller, H. (2002). Regulation of cell number by  
365 MAPK-dependent control of apoptosis: a mechanism for trophic survival signaling. *Dev Cell* *2*, 159-  
366 170.
- 367 Bidla, G., Hauling, T., Dushay, M.S., and Theopold, U. (2009). Activation of insect phenoloxidase  
368 after injury: endogenous versus foreign elicitors. *J Innate Immun* *1*, 301-308.
- 369 Caravagna, C., and Seaborn, T. (2016). Oxygen Sensing in Early Life. *Lung* *194*, 715-722.
- 370 Cevik, D., Acker, M., Michalski, C., and Jacobs, J.R. (2019). Pericardin, a *Drosophila* collagen,  
371 facilitates accumulation of hemocytes at the heart. *Dev Biol* *454*, 52-65.
- 372 Chabi, S., Uzan, B., Naguibneva, I., Rucci, J., Fahy, L., Calvo, J., Arcangeli, M.L., Mazurier, F.,  
373 Pflumio, F., and Haddad, R. (2019). Hypoxia Regulates Lymphoid Development of Human  
374 Hematopoietic Progenitors. *Cell Rep* *29*, 2307-2320 e2306.
- 375 Chang, R.B., Strohlic, D.E., Williams, E.K., Umans, B.D., and Liberles, S.D. (2015). Vagal Sensory  
376 Neuron Subtypes that Differentially Control Breathing. *Cell* *161*, 622-633.
- 377 Cieslar-Pobuda, A., Knoflach, V., Ringh, M.V., Stark, J., Likus, W., Siemianowicz, K., Ghavami, S.,  
378 Hudecki, A., Green, J.L., and Los, M.J. (2017). Transdifferentiation and reprogramming: Overview  
379 of the processes, their similarities and differences. *Biochim Biophys Acta Mol Cell Res* *1864*, 1359-  
380 1369.
- 381 Cirovic, B., Schonheit, J., Kowenz-Leutz, E., Ivanovska, J., Klement, C., Pronina, N., Begay, V., and  
382 Leutz, A. (2017). C/EBP-Induced Transdifferentiation Reveals Granulocyte-Macrophage Precursor-  
383 like Plasticity of B Cells. *Stem Cell Reports* *8*, 346-359.
- 384 Collombet, S., van Oevelen, C., Sardina Ortega, J.L., Abou-Jaoude, W., Di Stefano, B., Thomas-  
385 Chollier, M., Graf, T., and Thieffry, D. (2017). Logical modeling of lymphoid and myeloid cell  
386 specification and transdifferentiation. *Proc Natl Acad Sci U S A* *114*, 5792-5799.
- 387 Corcoran, S., and Brückner, K. (2020). Quantification of blood cells in *Drosophila* and other insects.  
388 *Springer Protocols Handbooks: Immunity in Insects Sandrelli F, Tettamanti G, editors*, 65-77.
- 389 Cutz, E., Yeger, H., and Pan, J. (2007). Pulmonary neuroendocrine cell system in pediatric lung  
390 disease-recent advances. *Pediatr Dev Pathol* *10*, 419-435.
- 391 Davies, L.C., Jenkins, S.J., Allen, J.E., and Taylor, P.R. (2013). Tissue-resident macrophages. *Nat*  
392 *Immunol* *14*, 986-995.
- 393 Di Tullio, A., Vu Manh, T.P., Schubert, A., Castellano, G., Mansson, R., and Graf, T. (2011).  
394 CCAAT/enhancer binding protein alpha (C/EBP(alpha))-induced transdifferentiation of pre-B cells  
395 into macrophages involves no overt retrodifferentiation. *Proc Natl Acad Sci U S A* *108*, 17016-  
396 17021.

- 397 Dudzic, J.P., Kondo, S., Ueda, R., Bergman, C.M., and Lemaitre, B. (2015). *Drosophila* innate  
398 immunity: regional and functional specialization of prophenoloxidases. *BMC Biol* 13, 81.
- 399 Duvic, B., Hoffmann, J.A., Meister, M., and Royet, J. (2002). Notch signaling controls lineage  
400 specification during *Drosophila* larval hematopoiesis. *Curr Biol* 12, 1923-1927.
- 401 Gold, K.S., and Brückner, K. (2014). *Drosophila* as a model for the two myeloid blood cell systems  
402 in vertebrates. *Exp Hematol* 42, 717-727.
- 403 Gold, K.S., and Brückner, K. (2015). Macrophages and cellular immunity in *Drosophila*  
404 *melanogaster*. *Semin Immunol* 27, 357-368.
- 405 Gorr, T.A., Gassmann, M., and Wappner, P. (2006). Sensing and responding to hypoxia via HIF in  
406 model invertebrates. *J Insect Physiol* 52, 349-364.
- 407 Graf, T. (2011). Historical origins of transdifferentiation and reprogramming. *Cell Stem Cell* 9, 504-  
408 516.
- 409 Haase, V.H. (2013). Regulation of erythropoiesis by hypoxia-inducible factors. *Blood Rev* 27, 41-53.
- 410 Hamada, F.N., Rosenzweig, M., Kang, K., Pulver, S.R., Ghezzi, A., Jegla, T.J., and Garrity, P.A.  
411 (2008). An internal thermal sensor controlling temperature preference in *Drosophila*. *Nature* 454,  
412 217-220.
- 413 Hanoun, M., Maryanovich, M., Arnal-Estape, A., and Frenette, P.S. (2015). Neural regulation of  
414 hematopoiesis, inflammation, and cancer. *Neuron* 86, 360-373.
- 415 Hayashi, S., and Kondo, T. (2018). Development and Function of the *Drosophila* Tracheal System.  
416 *Genetics* 209, 367-380.
- 417 Holz, A., Bossinger, B., Strasser, T., Janning, W., and Klapper, R. (2003). The two origins of  
418 hemocytes in *Drosophila*. *Development* 130, 4955-4962.
- 419 Huang, S.H., Rio, D.C., and Marletta, M.A. (2007). Ligand binding and inhibition of an oxygen-  
420 sensitive soluble guanylate cyclase, Gyc-88E, from *Drosophila*. *Biochemistry* 46, 15115-15122.
- 421 Imanirad, P., and Dzierzak, E. (2013). Hypoxia and HIFs in regulating the development of the  
422 hematopoietic system. *Blood Cells Mol Dis* 51, 256-263.
- 423 Inokuchi, K., Kato, A., Hiraia, K., Hishinuma, F., Inoue, M., and Ozawa, F. (1996). Increase in  
424 activin beta A mRNA in rat hippocampus during long-term potentiation. *FEBS Lett* 382, 48-52.
- 425 Kaupp, U.B., and Seifert, R. (2002). Cyclic nucleotide-gated ion channels. *Physiol Rev* 82, 769-824.
- 426 Krzemien, J., Dubois, L., Makki, R., Meister, M., Vincent, A., and Crozatier, M. (2007). Control of  
427 blood cell homeostasis in *Drosophila* larvae by the posterior signalling centre. *Nature* 446, 325-328.
- 428 Kuhn, D.T., Sawyer, M., Packert, G., Turenchalk, G., Mack, J.A., Sprey, T.E., Gustavson, E., and  
429 Kornberg, T.B. (1992). Development of the *D. melanogaster* caudal segments involves suppression  
430 of the ventral regions of A8, A9 and A10. *Development* 116, 11-20.
- 431 Kumar, A., and Brockes, J.P. (2012). Nerve dependence in tissue, organ, and appendage regeneration.  
432 *Trends in neurosciences* 35, 691-699.
- 433 Lanot, R., Zachary, D., Holder, F., and Meister, M. (2001). Postembryonic hematopoiesis in  
434 *Drosophila*. *Dev Biol* 230, 243-257.
- 435 Lebestky, T., Chang, T., Hartenstein, V., and Banerjee, U. (2000). Specification of *Drosophila*  
436 hematopoietic lineage by conserved transcription factors. *Science* 288, 146-149.



- 437 Lebestky, T., Jung, S.H., and Banerjee, U. (2003). A Serrate-expressing signaling center controls  
438 *Drosophila* hematopoiesis. *Genes Dev* 17, 348-353.
- 439 Lefrancais, E., Ortiz-Munoz, G., Caudrillier, A., Mallavia, B., Liu, F., Sayah, D.M., Thornton, E.E.,  
440 Headley, M.B., David, T., Coughlin, S.R., *et al.* (2017). The lung is a site of platelet biogenesis and a  
441 reservoir for haematopoietic progenitors. *Nature* 544, 105-109.
- 442 Leitao, A.B., and Sucena, E. (2015). *Drosophila* sessile hemocyte clusters are true hematopoietic  
443 tissues that regulate larval blood cell differentiation. *Elife* 4.
- 444 Li, P., Burke, S., Wang, J., Chen, X., Ortiz, M., Lee, S.C., Lu, D., Campos, L., Goulding, D., Ng,  
445 B.L., *et al.* (2010). Reprogramming of T cells to natural killer-like cells upon Bcl11b deletion.  
446 *Science* 329, 85-89.
- 447 Lu, A., Zhang, Q., Zhang, J., Yang, B., Wu, K., Xie, W., Luan, Y.X., and Ling, E. (2014). Insect  
448 prophenoloxidase: the view beyond immunity. *Front Physiol* 5, 252.
- 449 Majmundar, A.J., Wong, W.J., and Simon, M.C. (2010). Hypoxia-inducible factors and the response  
450 to hypoxic stress. *Mol Cell* 40, 294-309.
- 451 Makhijani, K., Alexander, B., Rao, D., Petraki, S., Herboso, L., Kukar, K., Batool, I., Wachner, S.,  
452 Gold, K.S., Wong, C., *et al.* (2017). Regulation of *Drosophila* hematopoietic sites by Activin-beta  
453 from active sensory neurons. *Nat Commun* 8, 15990.
- 454 Makhijani, K., Alexander, B., Tanaka, T., Rulifson, E., and Brückner, K. (2011). The peripheral  
455 nervous system supports blood cell homing and survival in the *Drosophila* larva. *Development* 138,  
456 5379-5391.
- 457 Makhijani, K., and Brückner, K. (2012). Of blood cells and the nervous system: Hematopoiesis in the  
458 *Drosophila* larva. *Fly (Austin)* 6, 254-260.
- 459 Markus, R., Laurinyecz, B., Kurucz, E., Honti, V., Bajusz, I., Sipos, B., Somogyi, K., Kronhamn, J.,  
460 Hultmark, D., and Ando, I. (2009). Sessile hemocytes as a hematopoietic compartment in *Drosophila*  
461 *melanogaster*. *Proc Natl Acad Sci U S A* 106, 4805-4809.
- 462 Martin, J.F., Slater, D.N., and Trowbridge, E.A. (1983). Abnormal intrapulmonary platelet  
463 production: a possible cause of vascular and lung disease. *Lancet* 1, 793-796.
- 464 Mazzone, S.B., and Undem, B.J. (2016). Vagal Afferent Innervation of the Airways in Health and  
465 Disease. *Physiol Rev* 96, 975-1024.
- 466 McGuire, S.E., Le, P.T., Osborn, A.J., Matsumoto, K., and Davis, R.L. (2003). Spatiotemporal rescue  
467 of memory dysfunction in *Drosophila*. *Science* 302, 1765-1768.
- 468 Miyashita, T., Oda, Y., Horiuchi, J., Yin, J.C., Morimoto, T., and Saitoe, M. (2012). Mg(2+) block of  
469 *Drosophila* NMDA receptors is required for long-term memory formation and CREB-dependent gene  
470 expression. *Neuron* 74, 887-898.
- 471 Morton, D.B. (2004). Atypical soluble guanylyl cyclases in *Drosophila* can function as molecular  
472 oxygen sensors. *J Biol Chem* 279, 50651-50653.
- 473 Morton, D.B. (2011). Behavioral responses to hypoxia and hyperoxia in *Drosophila* larvae:  
474 molecular and neuronal sensors. *Fly (Austin)* 5, 119-125.
- 475 Morton, D.B., Langlais, K.K., Stewart, J.A., and Vermehren, A. (2005). Comparison of the properties  
476 of the five soluble guanylyl cyclase subunits in *Drosophila melanogaster*. *J Insect Sci* 5, 12.

- 477 Morton, D.B., Stewart, J.A., Langlais, K.K., Clemens-Grisham, R.A., and Vermehren, A. (2008).  
478 Synaptic transmission in neurons that express the *Drosophila* atypical soluble guanylyl cyclases,  
479 Gyc-89Da and Gyc-89Db, is necessary for the successful completion of larval and adult ecdysis. *J*  
480 *Exp Biol* 211, 1645-1656.
- 481 Mukherjee, T., Kim, W.S., Mandal, L., and Banerjee, U. (2011). Interaction between Notch and Hif-  
482 alpha in development and survival of *Drosophila* blood cells. *Science* 332, 1210-1213.
- 483 Pavlov, V.A., and Tracey, K.J. (2012). The vagus nerve and the inflammatory reflex--linking  
484 immunity and metabolism. *Nature reviews. Endocrinology* 8, 743-754.
- 485 Perdiguero, E.G., and Geissmann, F. (2016). The development and maintenance of resident  
486 macrophages. *Nat Immunol* 17, 2-8.
- 487 Pesaresi, M., Sebastian-Perez, R., and Cosma, M.P. (2019). Dedifferentiation, transdifferentiation and  
488 cell fusion: in vivo reprogramming strategies for regenerative medicine. *Febs J* 286, 1074-1093.
- 489 Petraki, S., Alexander, B., and Brückner, K. (2015). Assaying Blood Cell Populations of the  
490 *Drosophila melanogaster* Larva. *J Vis Exp*.
- 491 Pifferi, S., Boccaccio, A., and Menini, A. (2006). Cyclic nucleotide-gated ion channels in sensory  
492 transduction. *FEBS Lett* 580, 2853-2859.
- 493 Pokorski, M., Takeda, K., and Okada, Y. (2016). Oxygen Sensing Mechanisms: A Physiological  
494 Penumbra. *Adv Exp Med Biol* 952, 1-8.
- 495 Rapino, F., Robles, E.F., Richter-Larrea, J.A., Kallin, E.M., Martinez-Climent, J.A., and Graf, T.  
496 (2013). C/EBPalpha induces highly efficient macrophage transdifferentiation of B lymphoma and  
497 leukemia cell lines and impairs their tumorigenicity. *Cell Rep* 3, 1153-1163.
- 498 Reid, A., and Tursun, B. (2018). Transdifferentiation: do transition states lie on the path of  
499 development? *Curr Opin Syst Biol* 11, 18-23.
- 500 Rizki, M.T., and Rizki, R.M. (1959). Functional significance of the crystal cells in the larva of  
501 *Drosophila melanogaster*. *J Biophys Biochem Cytol* 5, 235-240.
- 502 Schindelin, J., Arganda-Carreras, I., Frise, E., Kaynig, V., Longair, M., Pietzsch, T., Preibisch, S.,  
503 Rueden, C., Saalfeld, S., Schmid, B., *et al.* (2012). Fiji: an open-source platform for biological-image  
504 analysis. *Nat Methods* 9, 676-682.
- 505 Sieweke, M.H., and Allen, J.E. (2013). Beyond stem cells: self-renewal of differentiated  
506 macrophages. *Science* 342, 1242974.
- 507 Sinenko, S.A., and Mathey-Prevot, B. (2004). Increased expression of *Drosophila* tetraspanin,  
508 Tsp68C, suppresses the abnormal proliferation of ytr-deficient and Ras/Raf-activated hemocytes.  
509 *Oncogene* 23, 9120-9128.
- 510 Siripin, D., Kheolamai, P., Y, U.P., Supokawej, A., Wattanapanitch, M., Klincumhom, N.,  
511 Laowtammathron, C., and Issaragrisil, S. (2015). Transdifferentiation of erythroblasts to  
512 megakaryocytes using FLI1 and ERG transcription factors. *Thromb Haemost* 114, 593-602.
- 513 Song, W., Onishi, M., Jan, L.Y., and Jan, Y.N. (2007). Peripheral multidendritic sensory neurons are  
514 necessary for rhythmic locomotion behavior in *Drosophila* larvae. *Proc Natl Acad Sci U S A* 104,  
515 5199-5204.
- 516 Stewart, S., Koh, T.W., Ghosh, A.C., and Carlson, J.R. (2015). Candidate ionotropic taste receptors  
517 in the *Drosophila* larva. *Proc Natl Acad Sci U S A* 112, 4195-4201.

- 518 Tattikota, S.G., Hu, Y., Liu, Y., Cho, B., Barrera, V., Steinbaugh, M., Yoon, S.-H., Comjean, A., Li,  
519 F., Dervis, F., *et al.* (2019). A single-cell survey of *Drosophila* blood. bioRxiv,  
520 2019.2012.2020.884999.
- 521 Tokusumi, T., Shoue, D.A., Tokusumi, Y., Stoller, J.R., and Schulz, R.A. (2009). New hemocyte-  
522 specific enhancer-reporter transgenes for the analysis of hematopoiesis in *Drosophila*. *Genesis* 47,  
523 771-774.
- 524 Vermehren, A., Langlais, K.K., and Morton, D.B. (2006). Oxygen-sensitive guanylyl cyclases in  
525 insects and their potential roles in oxygen detection and in feeding behaviors. *J Insect Physiol* 52,  
526 340-348.
- 527 Vermehren-Schmaedick, A., Ainsley, J.A., Johnson, W.A., Davies, S.A., and Morton, D.B. (2010).  
528 Behavioral responses to hypoxia in *Drosophila* larvae are mediated by atypical soluble guanylyl  
529 cyclases. *Genetics* 186, 183-196.
- 530 Vermehren-Schmaedick, A., Scudder, C., Timmermans, W., and Morton, D.B. (2011). *Drosophila*  
531 gustatory preference behaviors require the atypical soluble guanylyl cyclases. *J Comp Physiol A*  
532 *Neuroethol Sens Neural Behav Physiol* 197, 717-727.
- 533 Wu, Q., Wen, T., Lee, G., Park, J.H., Cai, H.N., and Shen, P. (2003). Developmental control of  
534 foraging and social behavior by the *Drosophila* neuropeptide Y-like system. *Neuron* 39, 147-161.
- 535 Xiang, Y., Yuan, Q., Vogt, N., Looger, L.L., Jan, L.Y., and Jan, Y.N. (2010). Light-avoidance-  
536 mediating photoreceptors tile the *Drosophila* larval body wall. *Nature* 468, 921-926.
- 537 Xie, H., Ye, M., Feng, R., and Graf, T. (2004). Stepwise reprogramming of B cells into macrophages.  
538 *Cell* 117, 663-676.
- 539 Yang, H., Kronhamn, J., Ekstrom, J.O., Korkut, G.G., and Hultmark, D. (2015). JAK/STAT signaling  
540 in *Drosophila* muscles controls the cellular immune response against parasitoid infection. *EMBO*  
541 *Rep* 16, 1664-1672.
- 542
- 543

544 **Figure Legends**

545

546 **Figure 1. Crystal cells in the *Drosophila* larva are generated by transdifferentiation**

547 (A) Development of crystal cell numbers over time. Crystal cells per larva, assessed by melanization,  
548 relative to larval size and developmental stage. Genotype is  $w^{1118}$ , n=155. Mean and standard  
549 deviation, regression analysis.

550 (B) Development of total hemocyte numbers over time. Total hemocytes per larva, genotype is  
551 *HmlΔGAL4, UAS-GFP; He-GAL4*; n=107. Mean and standard deviation, regression analysis.

552 (C-C'') Localization of plasmatocytes and crystal cells in the 3<sup>rd</sup> instar larva,; genotype is *BcF2-GFP/  
553 HmlΔ-DsRed*; plasmatocytes labeled by *HmlΔ-DsRed* (red); crystal cells labeled by *BcF2-GFP*  
554 (green); lateral view, posterior right.

555 (D-D') Model of distribution of plasmatocyte (red) and crystal cells (orange) in *Drosophila* larva,  
556 relevant sensory neuron clusters of the hematopoietic pockets (green); lateral view, posterior right.

557 (E-E'') Scheme of phagocytosis lineage tracing assay. Blue fluorescent latex beads are injected into  
558 early 3<sup>rd</sup> instar larvae, cells are released after indicated incubation times; fraction of cells containing  
559 phagocytosed beads are determined. Possible outcomes are depicted with crystal cells in orange,  
560 plasmatocytes in red, progenitors in grey.

561 (F) Sample image of analyzed cells; genotype *BcF2-GFP/ HmlΔ-DsRed*; crystal cells in green,  
562 plasmatocytes in red; blue arrowheads indicate crystal cells with incorporated blue beads.

563 (G) Quantification of samples as in (G); fraction of plasmatocytes and crystal cells containing blue  
564 beads at time 1h, 4, 22h after injection; n=21; mean and standard deviation.

565

566 **Figure 2. Sensory Neuron activity regulates transdifferentiation to crystal cells**

567 (A) Plasmatocytes colocalize with sensory neurons in all hematopoietic pockets; genotype *21-7-  
568 GAL4, UAS-CD8-GFP, HmlΔDsRed/CyO*; lateral view, posterior right.

569 (B) Crystal cells also colocalize with sensory neurons but are mainly found in a cluster at the caudal  
570 end of the larva; genotype *21-7-GAL4, UAS-CD8-GFP/+; BCF6-mCherry/+*; lateral view, posterior  
571 right.

572 (C) Treatment of larvae with the AchR agonist carbachol to mimic sensory neuron activation,  
573 treatment for 4h; genotype is *yw*; quantification of crystal cells by melanization; control n=65 (+45);  
574 carbachol n=34 (+50). Individual value plot with mean and standard deviation, two-way ANOVA.

575 (D) Transient silencing of sensory neurons, quantification of crystal cells by melanization; genotypes  
576 are experiment *21-7-GAL4, UAS-CD8GFP, HmlΔ-DsRed/ UAS-Kir2.1; tubGAL80ts/ +* and control  
577 *21-7-GAL4, UAS-CD8GFP, HmlΔ-DsRed/ +; tubGAL80ts/ +*. Larvae induced at 29°C for 22h. Mean  
578 and standard deviation, two-way ANOVA.

579 (E, F) Phagocytosis lineage tracing, genotypes are experiment *21-7-GAL4, UAS-CD8GFP, HmlΔ-*  
580 *DsRed/ UAS-Kir2.1; BcF6-GFP/ tubGAL80ts*, and control *21-7-GAL4, UAS-CD8GFP, HmlΔ-DsRed/*  
581 *+; BcF6-GFP/ tubGAL80ts*.

582 (E) Sample image of analyzed cells, plasmatocytes (red), crystal cells (green), injected beads (blue).

583 (F) Quantification of samples as in (E); fraction of plasmatocytes and crystal cells containing blue  
584 beads, experiment n=12 and control n=12. Mean and standard deviation, two-way ANOVA.

585

586 **Figure 3. Crystal cells are clustered around the sensory cones and are promoted by sensory**  
587 **cone neurons**

588 (A-D) Localization of sensory neurons, plasmatocytes and crystal cells, caudal view of larvae; scale  
589 bars 0.25mm.

590 (A) Sensory neurons (green), genotype *21-7-GAL4, UAS-CD8-GFP, HmlΔ-DsRed/CyO*; 3rd instar  
591 larva.

592 (B) Plasmatocytes (green) and crystal cells (red), genotype *HmlΔ-GAL4, UAS-GFP; BcF6-mCherry*;  
593 *2<sup>nd</sup>* instar larva.

594 (C) Crystal cells (red) and sensory neurons (green), genotype *21-7-GAL4, UAS-CD8-GFP/+; BcF6-*  
595 *mCherry/+; 2<sup>nd</sup>* instar larva.

596 (D) Crystal cells (red) and sensory neurons (green), *21-7-GAL4, UAS-CD8-GFP/+; BcF6-*  
597 *mCherry/+; 3rd* instar larva.

598 (A'-D') Models corresponding to (A-D), respectively, plasmatocytes red, crystal cells orange,  
599 sensory neurons green; caudal view.

600 (A''-D'') Models, lateral view, corresponding to (A-C and A'-C'), respectively; lateral view.  
601 (E) *Gyc89Db-GAL4* driver expressing GFP in sensory cone neurons (green), lateral view, genotype is  
602 *UAS-GFP/+; Gyc89Db-GAL4/+*; lateral view, posterior right; scale bar 0.5mm.  
603 (F) Larva as in (E), caudal view.  
604 (G) Ablation of sensory cone neurons affects crystal cells; quantification of crystal cells per larva by  
605 melanization. Genotypes are experiment *UAS-Hid ala5/+; Gyc89Db-GAL4/tubGAL80ts*, n=34 and  
606 control *Gyc89Db-GAL4/tubGAL80ts*, n=34. Crosses were raised at 18°C and temperature shifted to  
607 29 °C for 16 h. Individual value plot with mean and standard deviation, two-way ANOVA.  
608 (H) Transient activation of TrpA1 in sensory cone neurons; quantification of crystal cells per larva by  
609 melanization. Genotypes are experiment *UAS-TrpA1/ +; Gyc89Db-GAL4, / +*, n=46, and control  
610 *Gyc89Db-GAL4/+*, n=48; in addition, one experiment F1 cohort *UAS-TrpA1/ +; Gyc89Db-GAL4, /*  
611 *+*, n=47, was maintained as uninduced control at RT. Crosses were raised at RT and temperature  
612 shifted to 29°C for 4 hours;. Individual value plot with mean and standard deviation, two-way  
613 ANOVA.

614

615 **Figure 4. Oxygen sensing through Gycs in sensory cone neurons drives plasmatocyte-to-crystal**  
616 **cell transdifferentiation**

617 (A) RNAi silencing of *Gyc88E* in sensory cone neurons results in reduced crystal cell numbers  
618 determined by melanization; genotypes are experiment *Gyc89Db-GAL4/UAS-Gyc88ERNai*, n=45 and  
619 control *Gyc89Db-GAL4/+*. n=45. Individual value plot with mean and standard deviation, two-way  
620 ANOVA.

621 (B) Phagocytosis lineage tracing, effect of *Gyc88E* RNAi in sensory cone neurons on  
622 transdifferentiation; genotypes are experiment *21-7-GAL4, UA5-CD8-GFP, HmlΔ-DsRed/+; BcF6-*  
623 *GFP/ UAS-Gyc88ERNai*, n=11 and control *21-7-GAL4, UA5-CD8-GFP, HmlΔ-DsRed/+; BcF6-*  
624 *GFP/+*, n=16. Bar chart with mean and standard deviation, two-way ANOVA.

625 (C) Effect of hypoxia (5% O<sub>2</sub>) on crystal cell number per larva determined by melanization;  
626 genotype is *w<sup>1118</sup>*; hypoxia n=46 and normoxia n=48. Individual value plot with mean and standard  
627 deviation, two-way ANOVA.

628 (D) Phagocytosis lineage tracing, effect of hypoxia (5% O<sub>2</sub>) on transdifferentiation; genotype is  
629 *HmlΔ-GAL4, UAS-GFP; BcF6-mCherry*; hypoxia n=14 and normoxia n=15. Bar chart with mean and  
630 standard deviation, two-way ANOVA.

631 (E) Model. Sensory cone neurons detect oxygen by cytoplasmic Gyc heterodimeric oxygen sensors.  
632 Gycs convert GTP to cGMP, which activates CNG channels, resulting in influx of calcium (Ca<sup>2+</sup>)  
633 leading to downstream signaling and neuronal activation. Active neurons induce plasmatocyte-to-  
634 crystal cell transdifferentiation.

635

636

637

638

639 **Supplemental Materials**

640

641 **Supplemental Figure 1. Methods of crystal cell labeling**

642 (A) Heat induced melanization of crystal cells. Genotype is *lz-GAL4;UAS-GFP*

643 (B) Fluorescent reporter labeling to visualize, and quantify, crystal cells. Genotype is *lz-GAL4;UAS-*  
644 *GFP*. Note that the labeled crystal cell pattern by both methods is very similar.

645

646 **Supplemental Figure 2. Limited transient sensory neuron silencing does not affect total**  
647 **hemocyte numbers**

648 (A) Transient silencing of sensory neurons, quantification of total hemocytes; genotypes are *21-7-*  
649 *GAL4, UAS-CD8-GFP, HmlΔ-DsRed/ UAS-Kir2.1; tubGAL80ts/ +* , n=12 and control *21-7-GAL4,*  
650 *UAS-CD8-GFP, HmlΔ-DsRed/ +; tubGAL80ts/ +* , n=13. Larvae induced at 29°C for 22h. Mean and  
651 standard deviation, two-way ANOVA

652

653 **Supplemental Figure 3. Hypoxia affects crystal cell counts but not total hemocyte numbers**

654 (A) Effect of 8% hypoxia on crystal cell number determined by melanization; genotype is *w1118*;  
655 hypoxia n=19 and normoxia control n=18. Individual value plot with mean and standard deviation,  
656 two-way ANOVA.

657 (B) Total hemocyte number under conditions of hypoxia (5% O<sub>2</sub>) and normoxia; genotype is *HmlΔ-*  
658 *GAL4, UAS-GFP; BcF6-mCherry*; hypoxia n=14 and normoxia control n=14. Mean and standard  
659 deviation, two-way ANOVA.

660

661 **Supplemental Figure 4. Models**

662 (A) Stimulated by oxygen, activated sensory cone neurons produce signal/s that drive  
663 transdifferentiation of a fraction of plasmatocytes to crystal cells. According to this model,  
664 transdifferentiation is triggered by contacting the sensory neuron signal, therefore plasmatocytes in  
665 anatomical proximity to the sensory cone neurons are most likely to convert into crystal cells.



666 (B) Model illustrating exposure of the caudal end of *Drosophila* larvae including the sensory cones  
667 and posterior spiracles to the air, while burying in food. Mature larvae leave the food in preparation  
668 of pupariation, now fully exposed to the air.

669

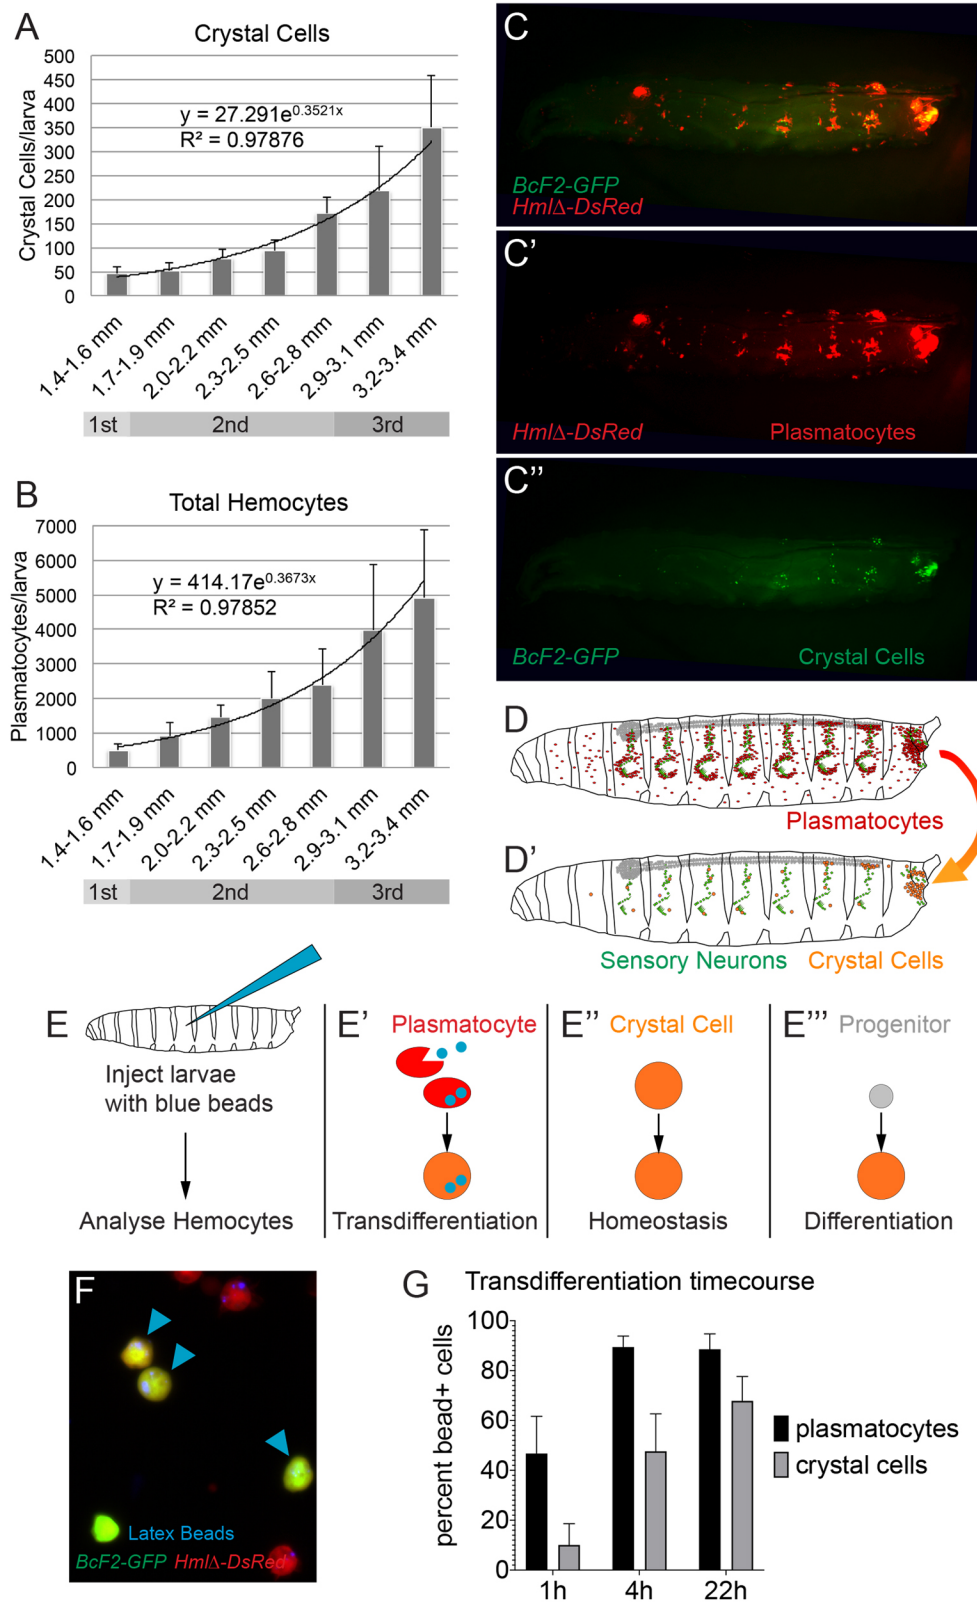

Corcoran et al., Figure 1

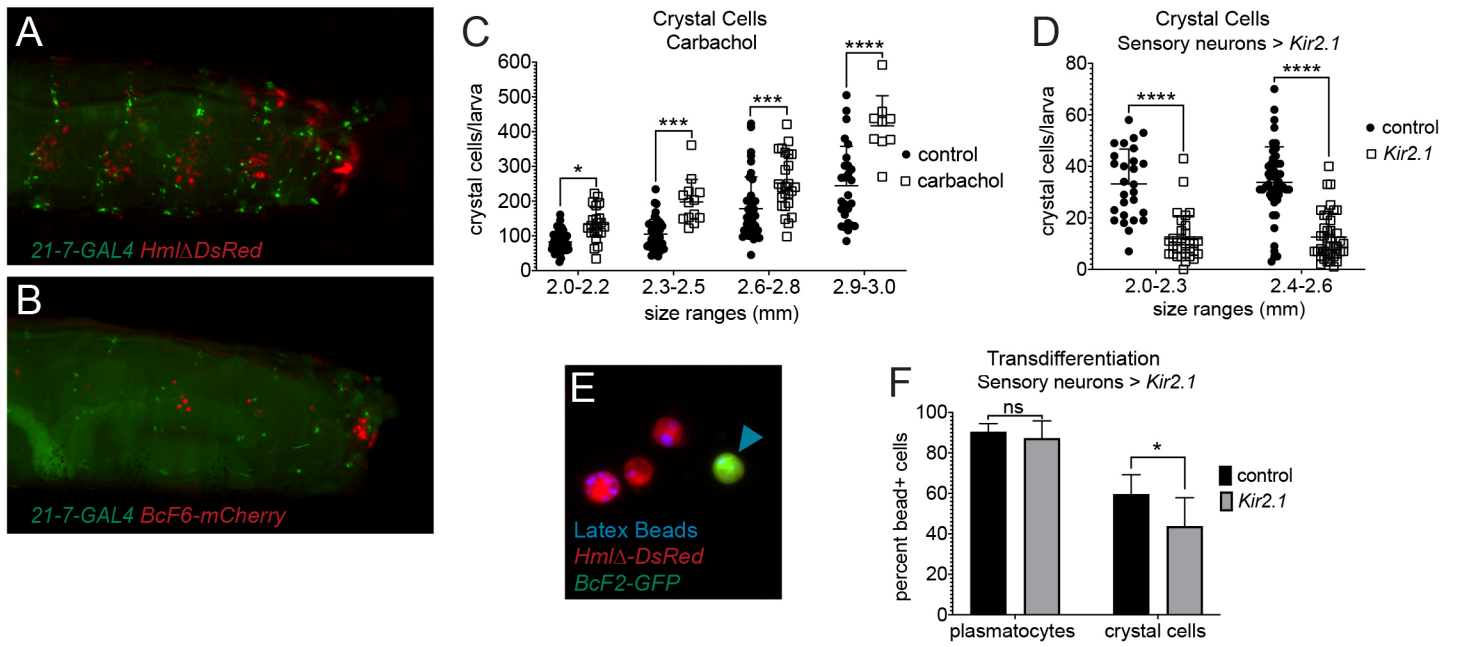

Corcoran et al. Figure 2

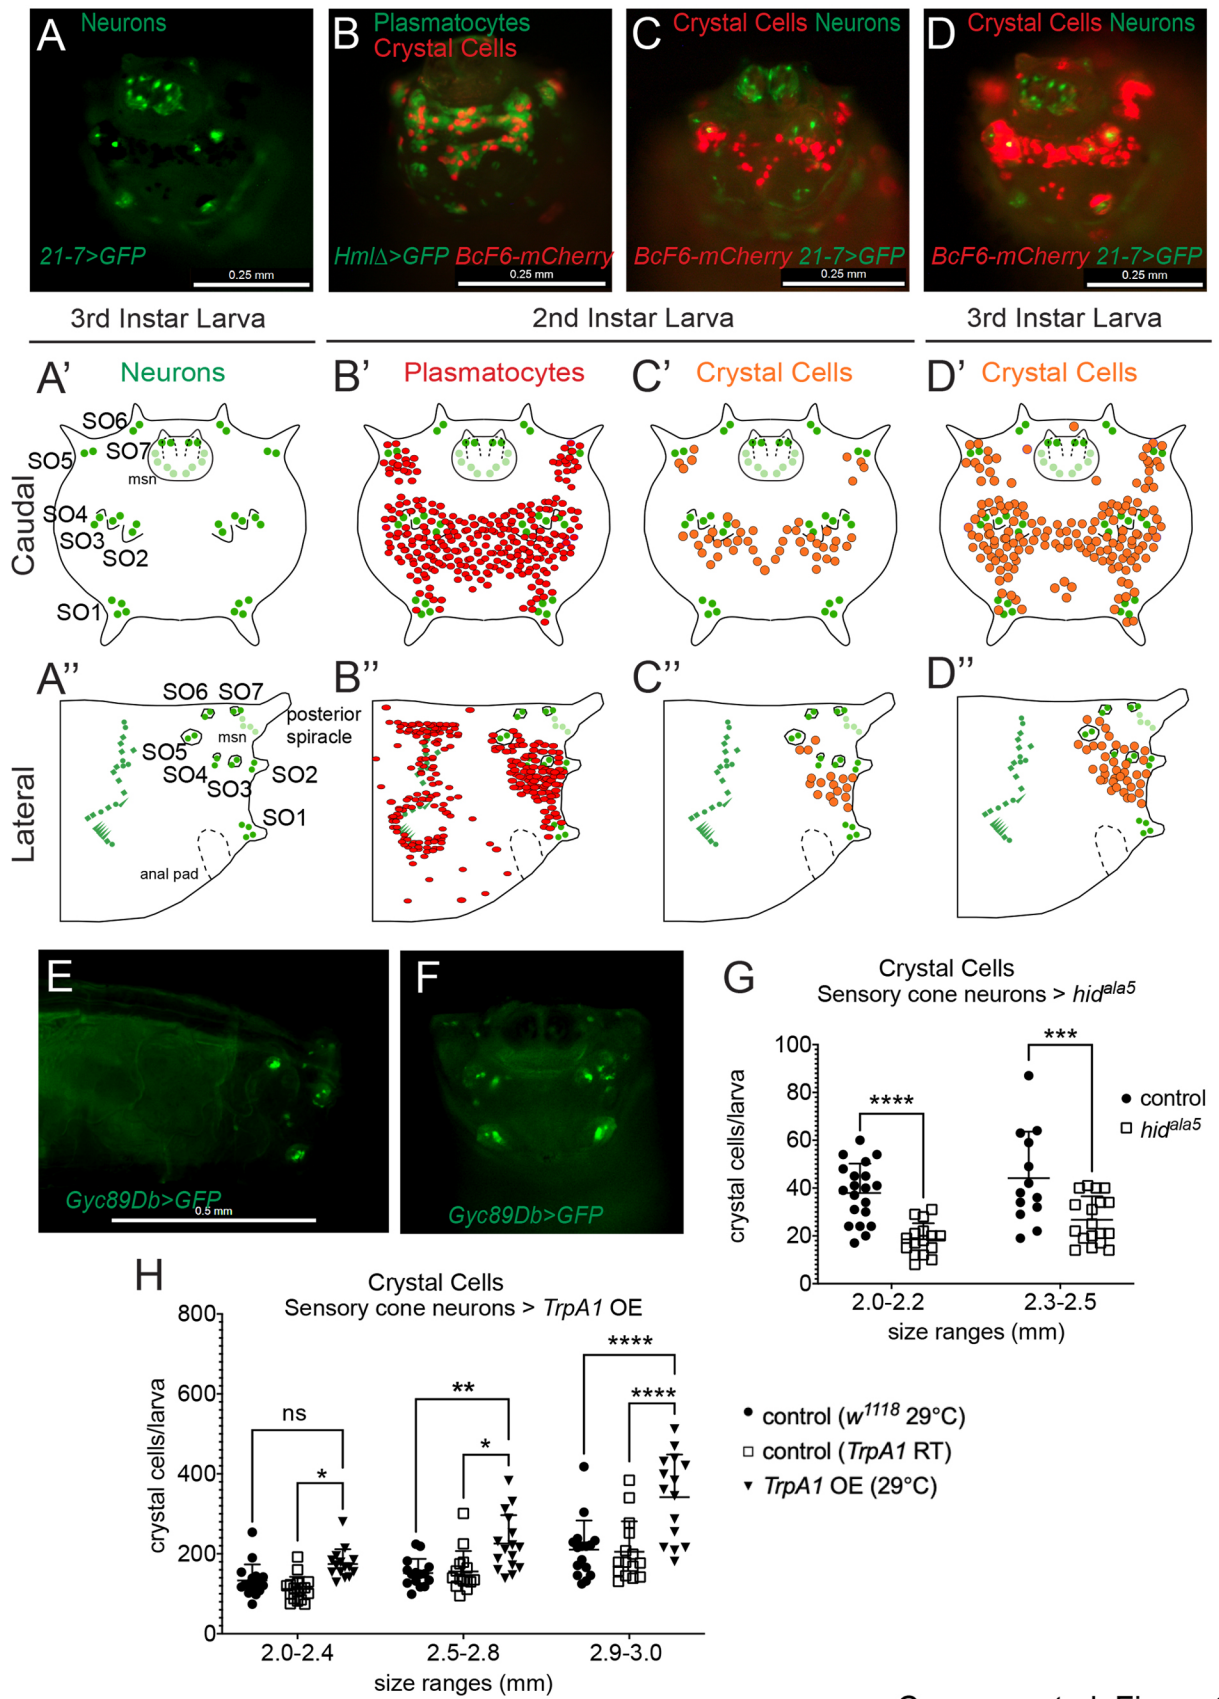

Corcoran et al. Figure 3

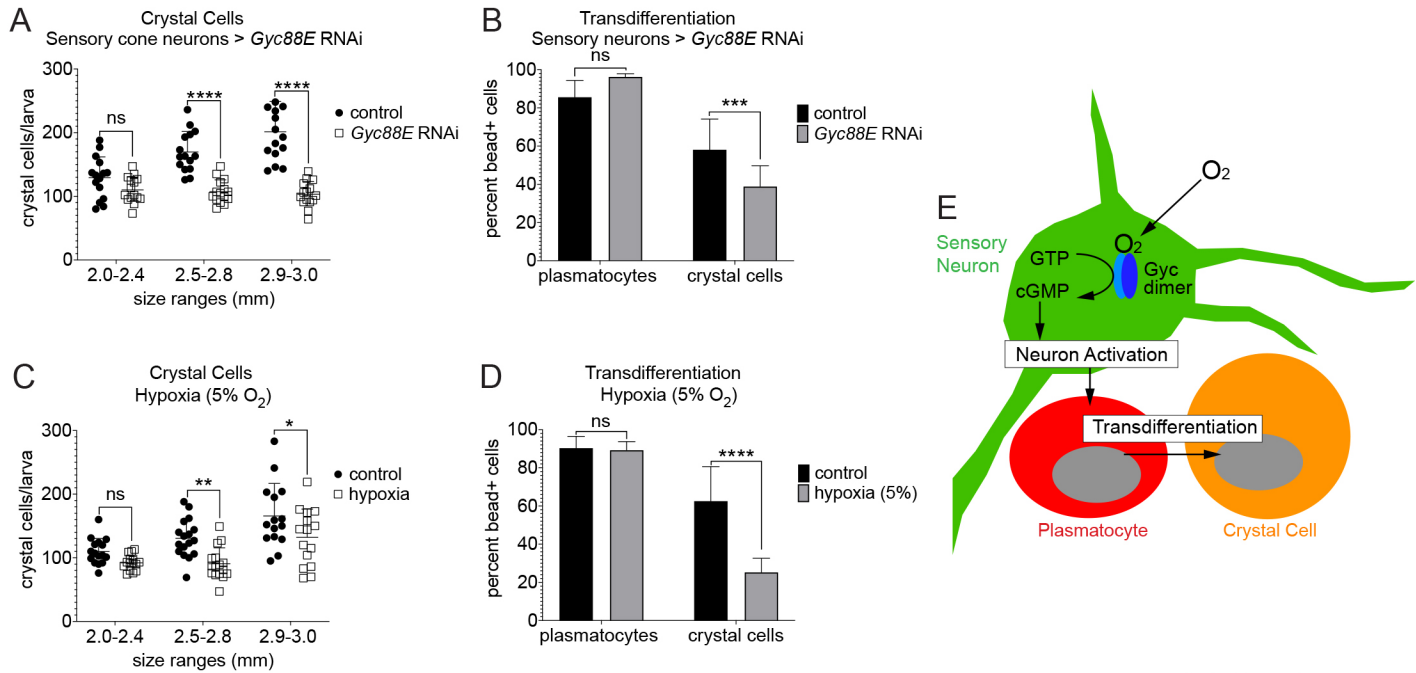

Corcoran et al. Figure 4

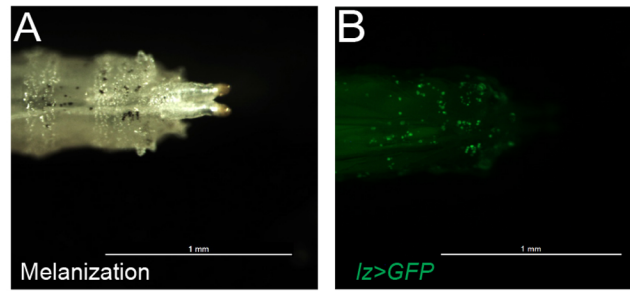

Corcoran et al. Supplemental Figure 1

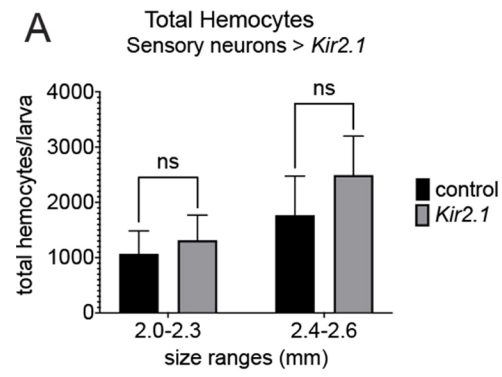

Corcoran et al. Supplemental Figure 2

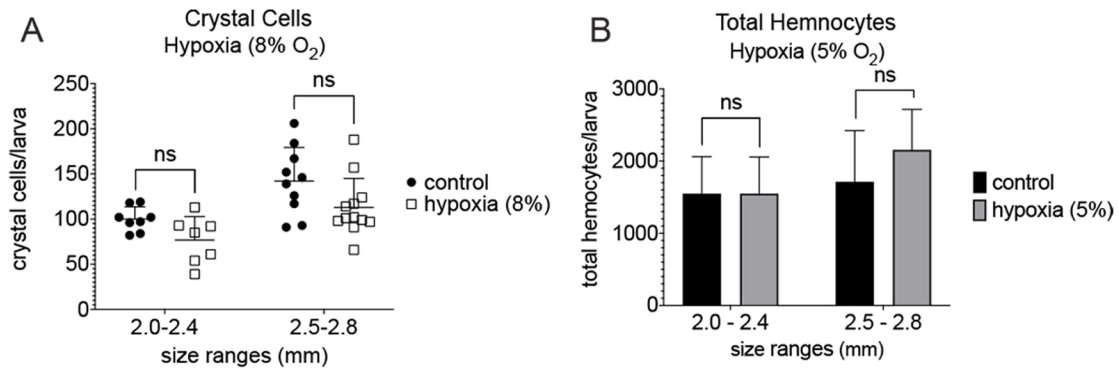

Corcoran et al. Supplemental Figure 3



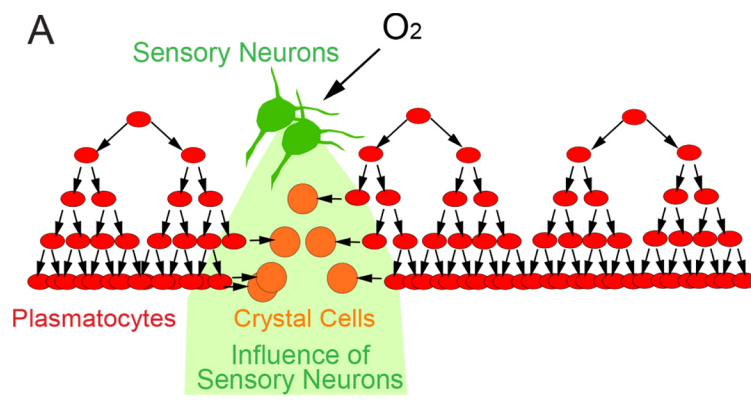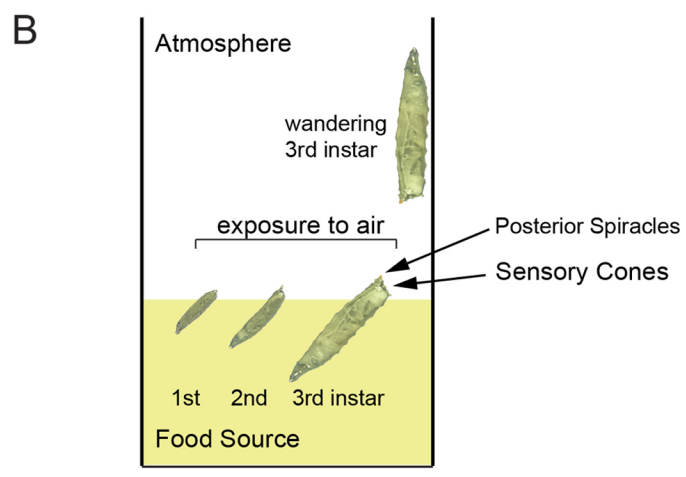

Corcoran et al. Supplemental Figure 4
